# Supplementary material
Source: Springer Nature journal article supplement (https://www.springermedizin.de/resource/supplementary/13231_2013_83_MOESM1_ESM.pdf/9676490)

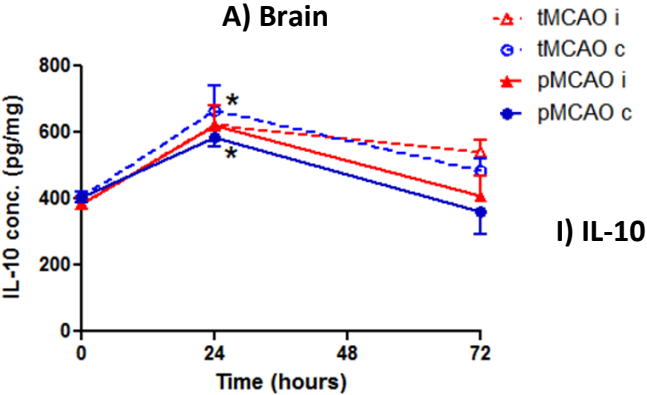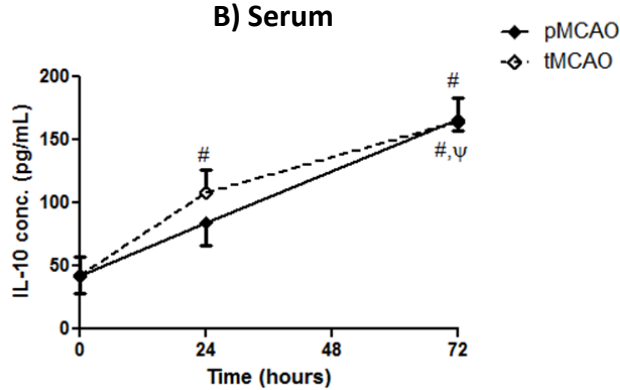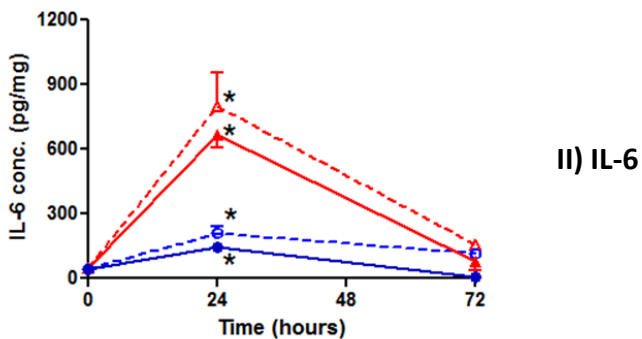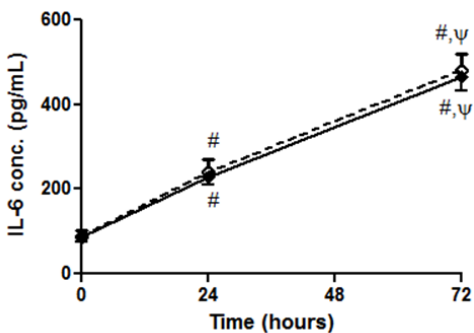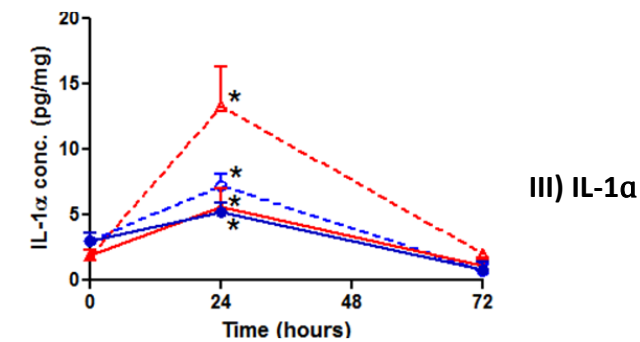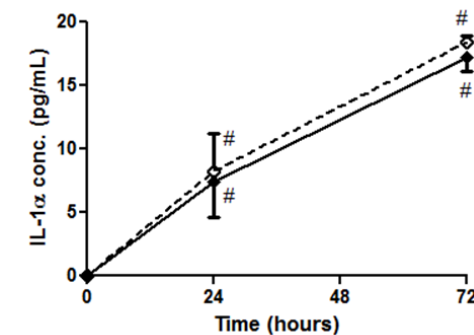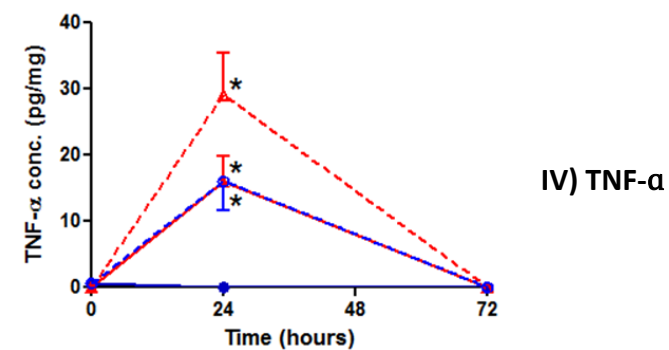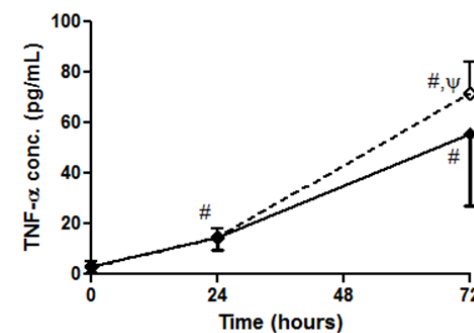

n= 6      5      3

n= 5      6      3

Supplement: MOESM1 [file 9676490]
